# Supplementary material
Source: PubMed Central journal article supplement (PMC5825290)
Supplement: NIHMS939486-supplement.pdf [file NIHMS939486-supplement.pdf]

## Supplementary Figures

### **Upregulation of histone-lysine methyltransferases plays a causal role in hexavalent chromium-induced cancer stem cell-like property and cell transformation**

Zhishan Wang, Jianjun Wu, Brock Humphries, Kazuya Kondo, Yiguo Jiang, Xianglin Shi, and Chengfeng Yang

### Table of Contents

**Supplementary Figure 1 (Fig. S1). Representative images of soft agar colony formation by chronic low dose Cr(VI) exposure-transformed BEAS-2B and 16HBE cells.**

**Supplementary Figure 2 (Fig. S2). Representative images of suspension culture sphere formation by chronic low dose Cr(VI) exposure-transformed BEAS-2B and 16HBE cells.**

**Supplementary Figure 3 (Fig. S3). The growth curve and images of tumors produced by inoculation of Cr(VI)-transformed BEAS-2B cells in nude mice.**

BEAS-2B Control

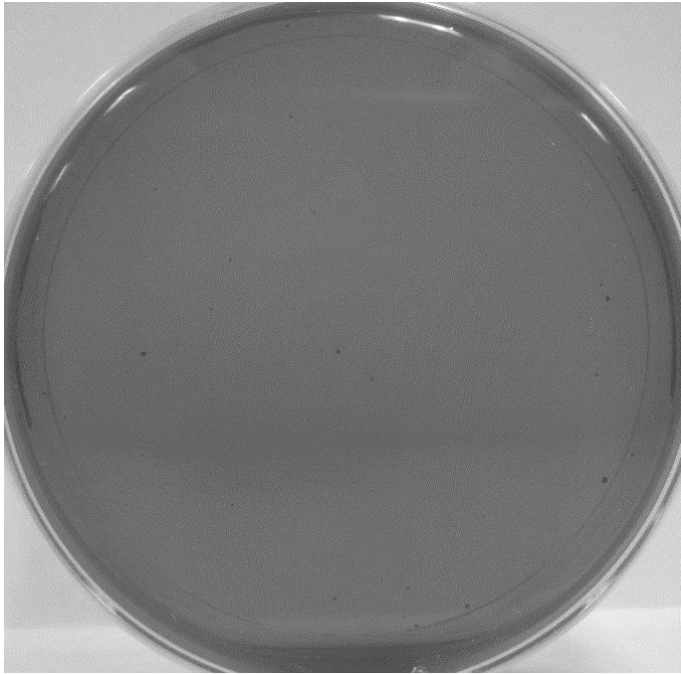

BEAS-2B-Cr(VI)

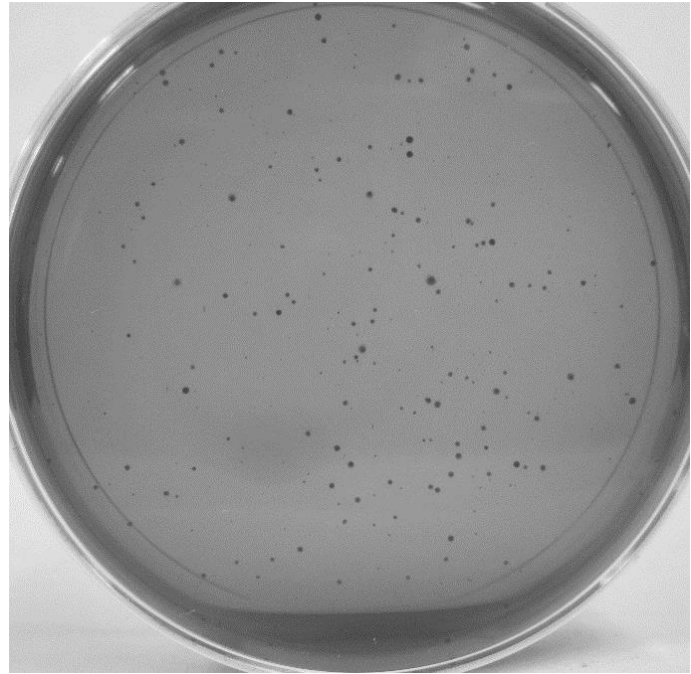

16HBE-Control

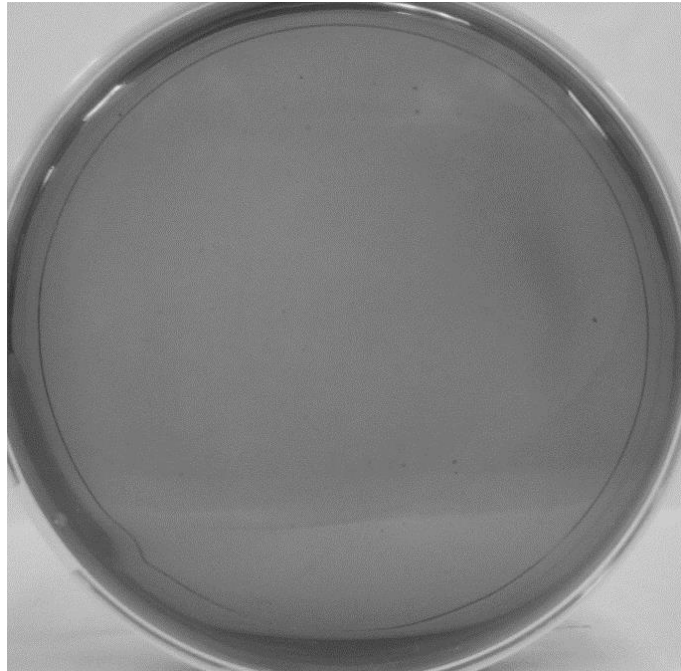

16HBE-Cr(VI)

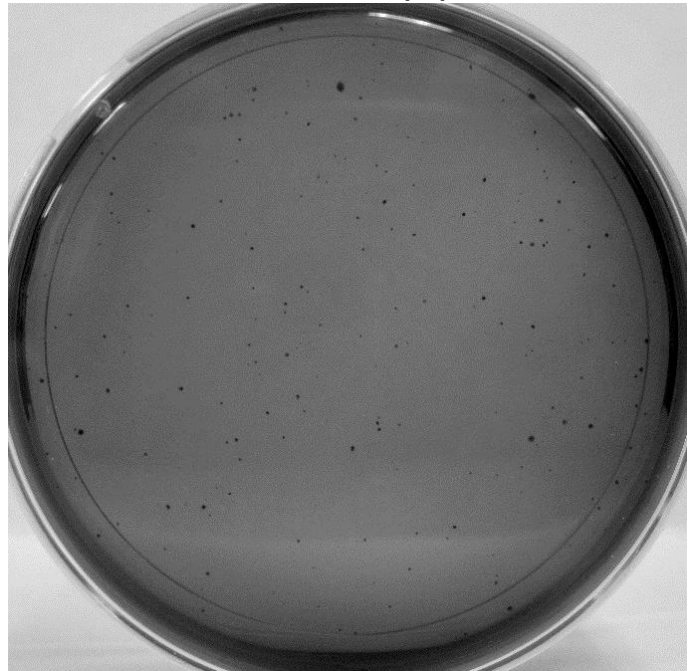

**Fig. S1. Representative images of soft agar colony formation by chronic low dose Cr(VI) exposure-transformed BEAS-2B and 16HBE cells.** After exposure to 0.25  $\mu\text{M}$  of Cr(VI) ( $\text{K}_2\text{Cr}_2\text{O}_7$ ) for 20 (BEAS-2B) or 40 (16HBE) weeks, passage-matched control and Cr(VI)-exposed cells were used for soft agar colony formation assay as described in Methods.

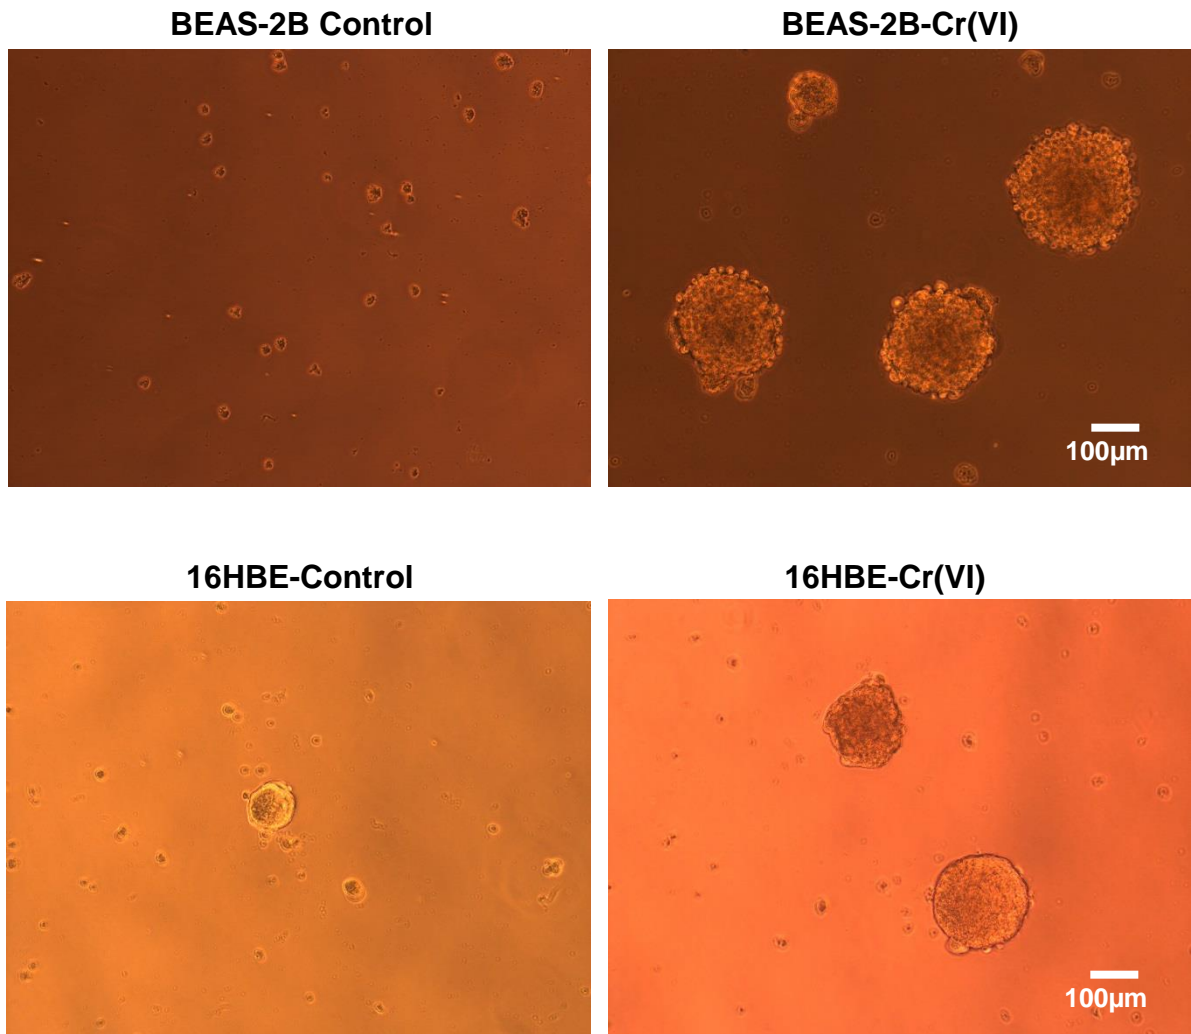

**Fig. S2. Representative images of suspension culture sphere formation by chronic low dose Cr(VI) exposure-transformed BEAS-2B and 16HBE cells.** After exposure to 0.25  $\mu\text{M}$  of Cr(VI) ( $\text{K}_2\text{Cr}_2\text{O}_7$ ) for 20 (BEAS-2B) or 40 (16HBE) weeks, passage-matched control and Cr(VI)-exposed cells were used for suspension culture sphere formation assay as described in Methods.

**A**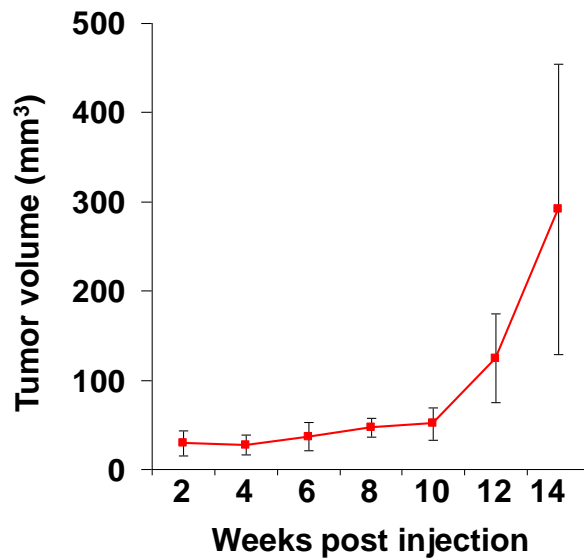**B**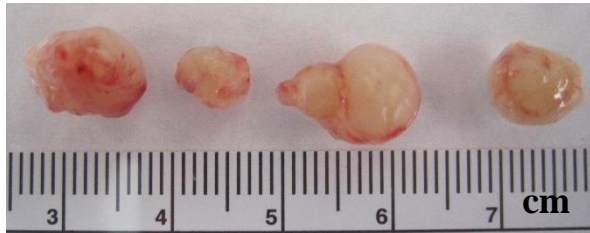

**Fig. S3. The growth curve and images of tumors produced by inoculation of Cr(VI)-transformed BEAS-2B cells in nude mice.** Passage-matched control cells and Cr(VI)-transformed BEAS-2B cells ( $1.5 \times 10^6$ ) suspended in 50  $\mu$ l of PBS were mixed with equal volume of growth factor reduced Matrigel and injected subcutaneously into the right flank of nude mouse. No tumor formation was observed from injection of passage-matched control cells. Tumor growth from injection of Cr(VI)-transformed cells was monitored daily and measured weekly. Mice were sacrificed 14 weeks after injection. **(A)** Tumor growth curve (mean  $\pm$  SD, n=4). **(B)** Images of tumors produced from injecting Cr(VI)-transformed BEAS-2B cells.
